# Supplementary material for: Impact of nutritional interventions among lactating mothers on the growth of their infants in the first 6 months of life: a randomized controlled trial in Delhi, India
Source: PubMed Central journal article supplement (PMC8023824; doi:10.1093/ajcn/nqaa383), 2021-02-10
Supplement: nqaa383_supplement_file.pdf [file nqaa383_supplement_file.pdf]

**Impact of nutritional interventions among lactating mothers on the growth of their infants in the first 6 months of life: a randomized controlled trial in Delhi, India**  
**Sunita Taneja**

**ONLINE SUPPLEMENTARY MATERIAL**

**SUPPLEMENTARY TABLE 1 Composition of the multiple micronutrient formulation**

| Nutrients             | Composition of Vitamin |           |
|-----------------------|------------------------|-----------|
|                       | Angels tablets         | %RDA WHO* |
| Vitamin A (µg/d)      | 800                    | 94        |
| Vitamin D (µg/d)      | 5                      | 100       |
| Vitamin K (µg/d)      | -                      |           |
| Vitamin C (µg/d)      | 70                     | 100       |
| Vitamin E (µg a-TE/d) | 10                     | 133       |
| Thiamine (mg/d)       | 1.4                    | 93        |
| Riboflavin (mg/d)     | 1.4                    | 88        |
| Niacin (mg/d)         | 18                     | 106       |
| Pyridoxine (mg/d)     | 1.9                    | 95        |
| Pantothenate (mg/d)   | -                      |           |
| Folate (µg/d)         | 400                    | 80        |
| Vitamin B12 (µg/d)    | 2.6                    | 93        |
| Biotin (µg/d)         | -                      |           |
| Iron (mg/d)           | 30                     | 200       |
| Calcium (mg/d)        | -                      |           |
| Zinc (mg/d)           | 15                     | 158       |
| Iodine (µg/d)         | 150                    | 75        |
| Selenium (µg/d)       | 65                     | 186       |

\*UNICEF/UNU/WHO. Composition of a multi-micronutrient supplement to be used in pilot programs among pregnant women in developing countries. New York, NY: UNICEF, 1999
